# Supplementary material
Source: Preprints.org preprint supplement (doi:10.20944/preprints202007.0204.v1)
Supplement: Supplementary file 1 [file supplementary]

**Self-supporting smart air filters based on PZT/PVDF electrospun nanofiber composite membrane**

Weidong He1,2,3, Yinghe Guo1,2,3, Fuze Jiang2,3, Yi-Bo Zhao2,3, Jean Schmitt2,3, Yang Yue2,3, Jingxian Liu1,*, Junji Cao4, Jing Wang2,3,*

1Filter Test Center, College of Resources and Civil Engineering, Northeastern University, NO. 3-11, Wenhua Road, Heping District, Shenyang, Liaoning 110819, China

2Institute of Environmental Engineering, ETH Zurich, 8093, Zurich, Switzerland

3Advanced Analytical Technologies, Empa, Ueberlandstrasse 129, 8600, Dübendorf, Switzerland

4Institute of Earth Environment, Chinese Academy of Sciences, No. 97, Yanxiang Road, Yanta Zone, Xian, Shanxi 710061, China

*Corresponding authors: jing.wang@ifu.baug.ethz.ch (J. Wang), 82003@126.com (J. Liu).


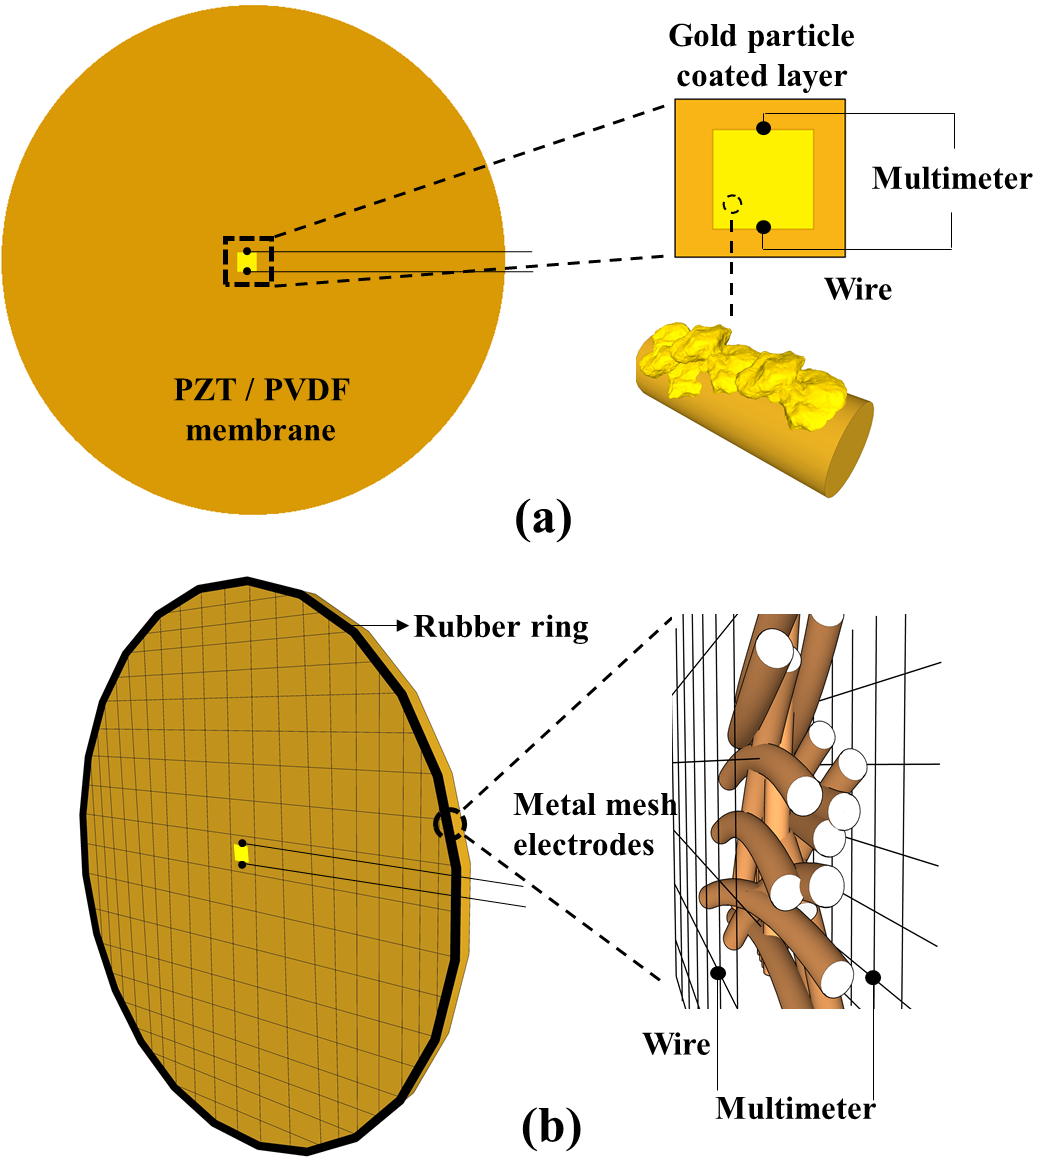


Fig.S1 The schematic diagram of SSSAF. (a) VOCs sensor.(b) Pressure drop sensor.


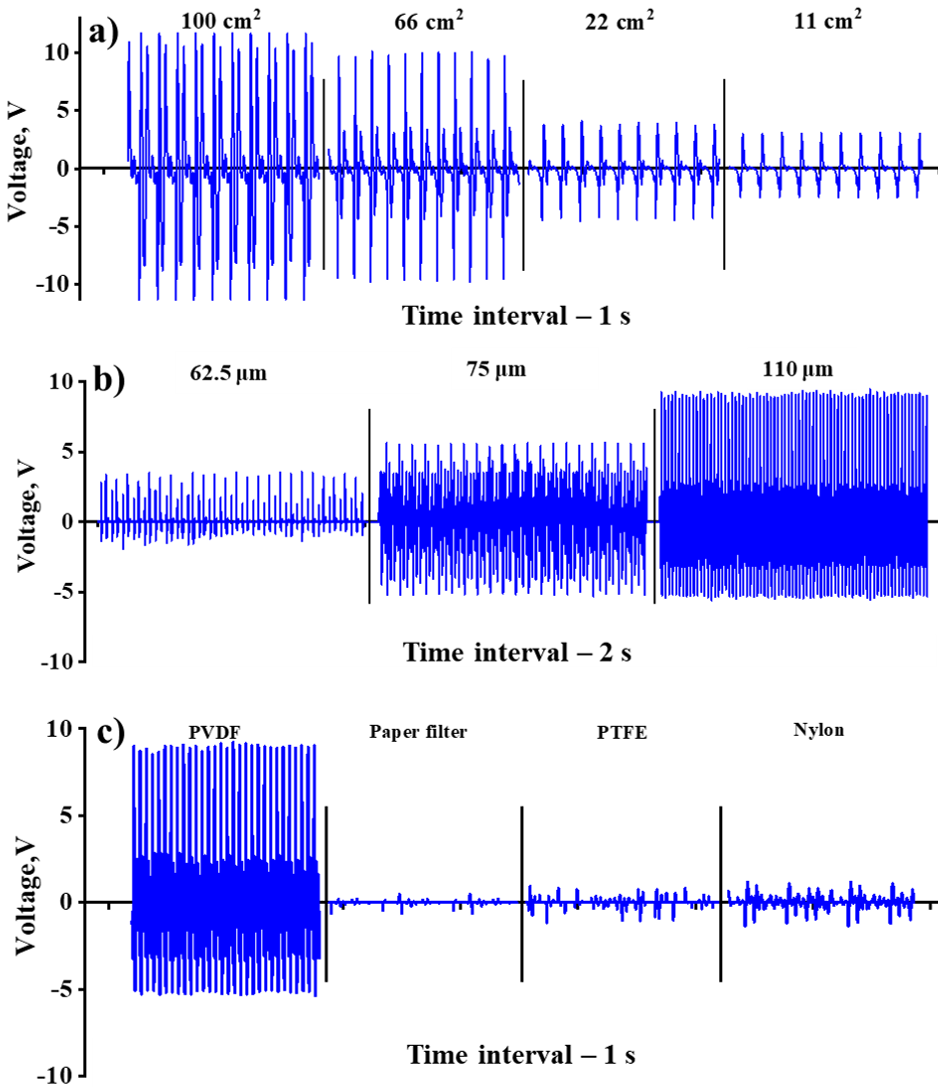


Fig. S2 a) The output voltage signal of SSSAF equipped with PZT/PVDF membranes of different area. b) The output voltage signal of SSSAF equipped with PZT/PVDF membranes of different thickness. c) The output voltage signal of PVDF membrane, paper filter, PTFE membrane and nylon membrane.


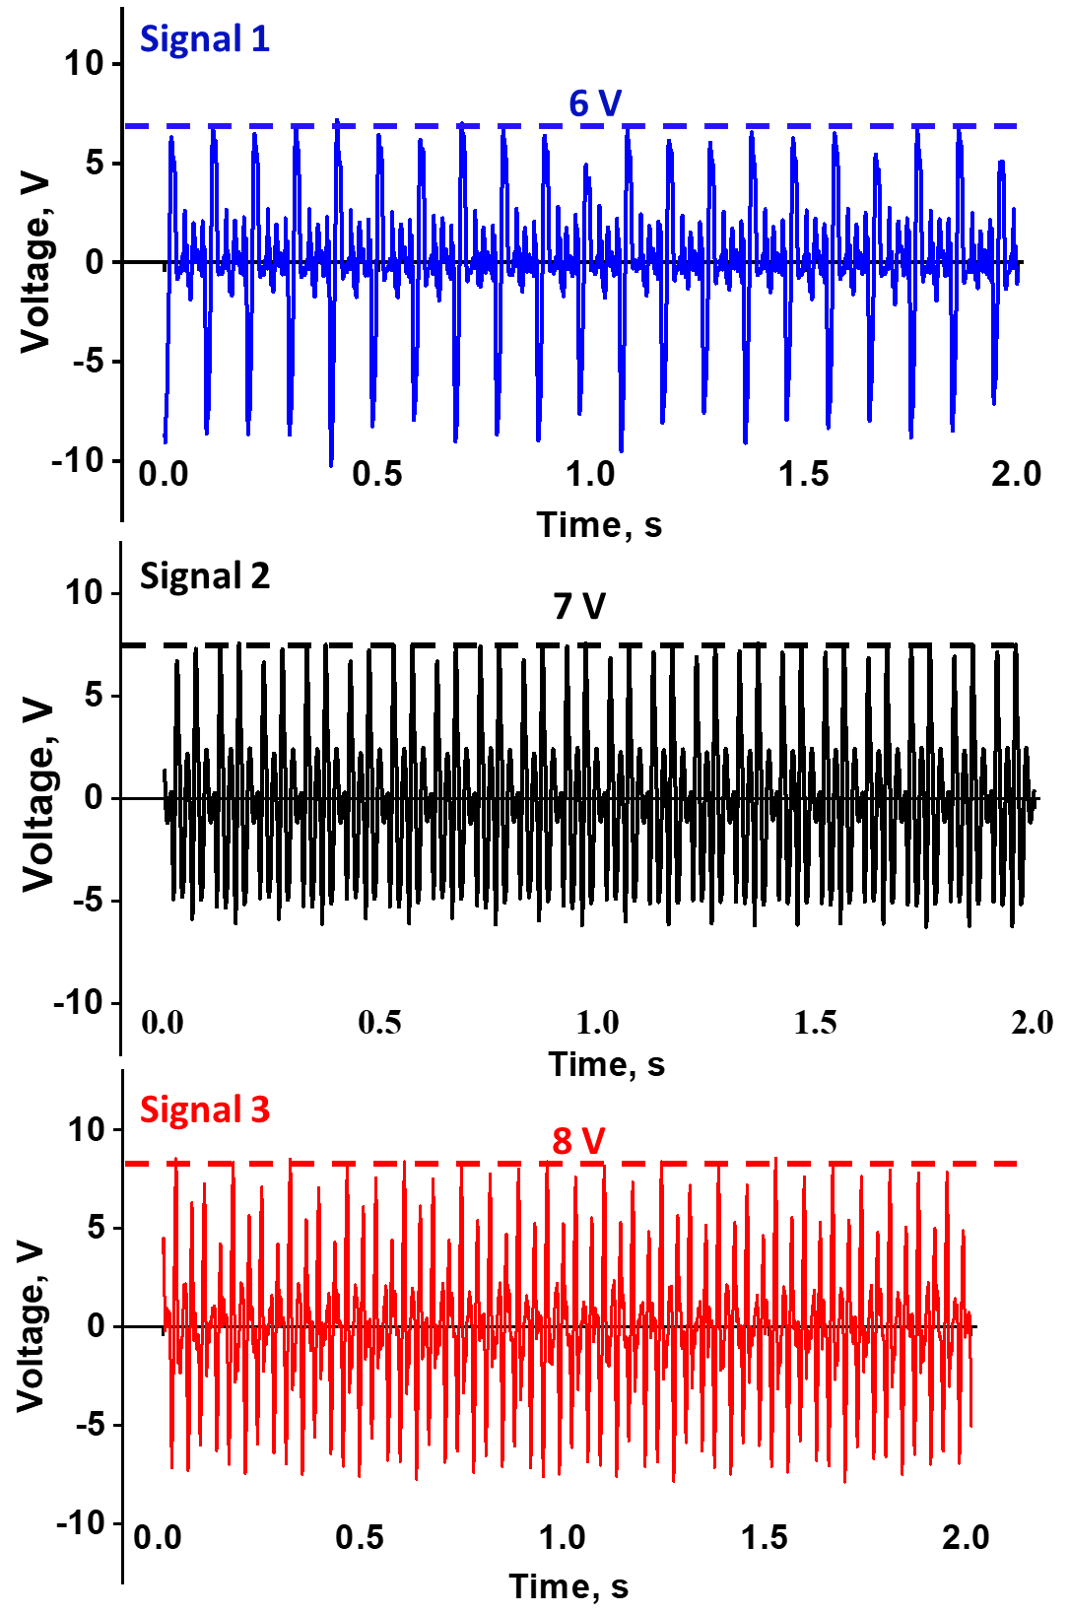


Fig. S3 Three voltage signals for energy harvesting measurement, all signals were generated by SSSAF based nanogenerator


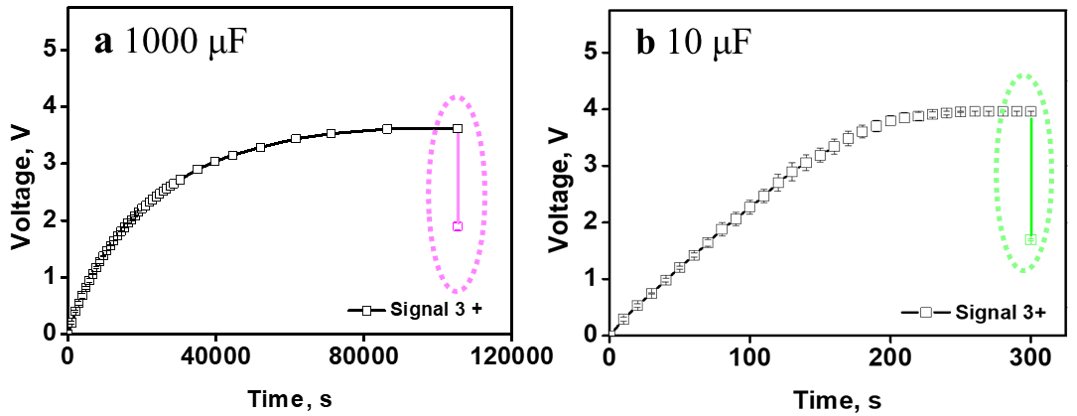


Fig. S4 Charge curves of capacitors with different capacity.


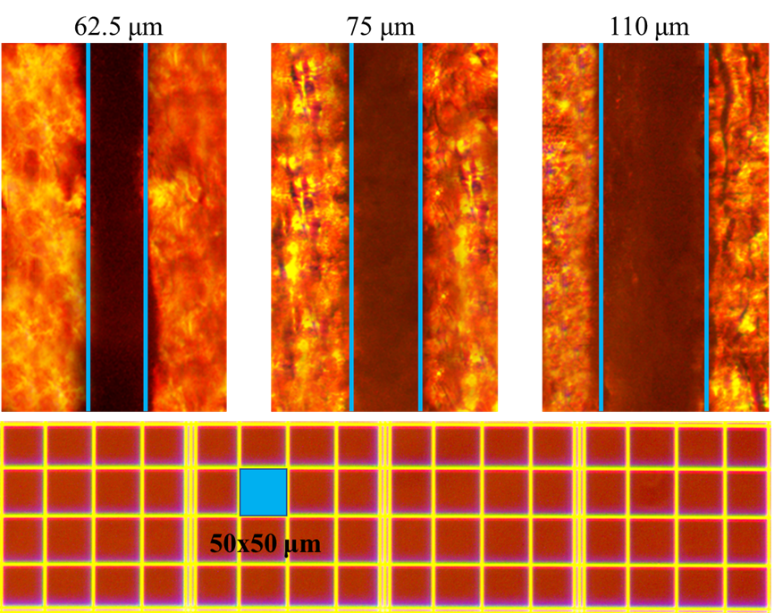


Fig. S5 Thickness of PZT/PVDF membranes which were used to equip SSSAF. The film was immersed in epoxy resin, cured and sliced, and the thickness of the film was measured via an optical microscope.


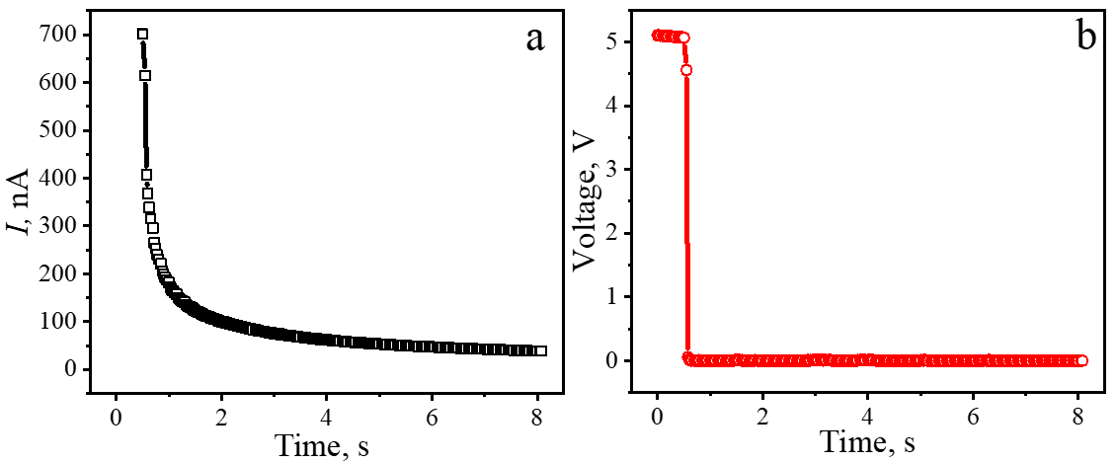


Fig. S6. Electrical discharge curve of capacitor which used for inhibiting bacteria, a) curve of electrical current, b) curve of voltage.
